# Supplementary material for: The value of pyrans as anticancer scaffolds in medicinal chemistry
Source: Royal Society of Chemistry journal article supplement (doi:10.1039/c7ra05441f), 2017-01-01
Supplement: c7ra05441f1.pdf [file c7ra05441f1.pdf]

## SUPPLEMENTARY INFORMATION

**Table S1.** Pyran based compounds as potential anticancer agents..

| Class                                                                  | Example   | IC <sub>50</sub> /GI <sub>50</sub> * (Target Cell line)  | Reference                           |
|------------------------------------------------------------------------|-----------|----------------------------------------------------------|-------------------------------------|
| Fused pyrano[3,4- <i>c</i> ]benzopyran and naphtho pyran derivative    | <b>27</b> | 1.5 (HeLa)                                               | Madda <i>et al.</i> <sup>26</sup>   |
| Fused pyrano[3,4- <i>c</i> ]benzopyran and naphtho pyran derivative    | <b>28</b> | 6.15 (MDA-MB-231)                                        | Madda <i>et al.</i> <sup>26</sup>   |
| Fused pyrano[3,4- <i>c</i> ]benzopyran and naphtho pyran derivative    | <b>29</b> | 4.81 (HeLa)<br>2.53 (A-549)                              | Madda <i>et al.</i> <sup>26</sup>   |
| Substituted 5-morpholino-7 <i>H</i> -thieno[3,2- <i>b</i> ]pyran-7-one | <b>33</b> | PI3-K $\delta$ -selective<br>IC <sub>50</sub> (nM) = 27  | Morales <i>et al.</i> <sup>27</sup> |
| Substituted 5-morpholino-7 <i>H</i> -thieno[3,2- <i>b</i> ]pyran-7-one | <b>32</b> | PI3-K- $\alpha$ -selective<br>IC <sub>50</sub> (nM) = 34 | Morales <i>et al.</i> <sup>27</sup> |
| Substituted 5-morpholino-7 <i>H</i> -thieno[3,2- <i>b</i> ]pyran-7-one | <b>31</b> | IC <sub>50</sub> (nM) = 297 (PI3K- $\alpha$ )            | Morales <i>et al.</i> <sup>27</sup> |
| 4 <i>H</i> -Pyrano-[2,3- <i>b</i> ]naphthoquinone                      | <b>36</b> | 2.2 (MCF-7)                                              | Magedov <i>et al.</i> <sup>34</sup> |

|                                                   |            |                                               |                                       |
|---------------------------------------------------|------------|-----------------------------------------------|---------------------------------------|
| 4 <i>H</i> -Pyrano-[2,3- <i>b</i> ]naphthoquinone | <b>37</b>  | 5.3(HeLa)<br>3.1 (MCF-7)<br>6.2 (PC-3)        | Magedov <i>et al.</i> <sup>34</sup>   |
| Novel (dihydro) pyranonaphthoquinone              | <b>44</b>  | 1.5 (KB)<br>3.6 (HepG2)                       | Thi <i>et al.</i> <sup>35</sup>       |
| Novel (dihydro) pyranonaphthoquinone              | <b>462</b> | 4.1 (KB)<br>10.7 (HepG2)                      | Thi <i>et al.</i> <sup>35</sup>       |
| Novel (dihydro) pyranonaphthoquinone              | <b>41</b>  | 5.6 (KB)<br>6.7 (HepG2)                       | Thi <i>et al.</i> <sup>35</sup>       |
| Novel (dihydro) pyranonaphthoquinone              | <b>43</b>  | 7.5 (KB)<br>10.2 (HepG2)                      | Thi <i>et al.</i> <sup>35</sup>       |
| 4 <i>H</i> -Chromen-4-one                         | <b>45</b>  | 0.79 ( A549 )<br>0.41 ( HL-60 )               | Switalska <i>et al.</i> <sup>61</sup> |
| 4 <i>H</i> -Chromen-4-one                         | <b>46</b>  | 0.35 ( HL-60 )                                | Switalska <i>et al.</i> <sup>61</sup> |
| 2 <i>H</i> -Chromen-2-yl                          | <b>47</b>  | 7.3 ( MCF-7 )<br>4.9 ( HT29 )<br>5.7 ( A498 ) | Murti <i>et al.</i> <sup>62</sup>     |
| 4',7-Dimethoxyflavanone                           | <b>48</b>  | Apoptotic cell population =<br>34.89%         | Choi <i>et al.</i> <sup>56</sup>      |
| 4 <i>H</i> -Benzo[ <i>h</i> ]chromen-4-one        | <b>59</b>  | 1.93 ( MiaPaCa-2)<br>5.63 (MCF-7)             | Kumar <i>et al.</i> <sup>63</sup>     |
| 4 <i>H</i> -Benzo[ <i>h</i> ]chromen-4-one        | <b>58</b>  | 5.44 ( MiaPaCa-2)                             | Kumar <i>et al.</i> <sup>63</sup>     |

|                                            |           |                                                                                   |                                    |
|--------------------------------------------|-----------|-----------------------------------------------------------------------------------|------------------------------------|
|                                            |           | 8.13 (MCF-7)                                                                      |                                    |
| 4 <i>H</i> -Benzo[ <i>h</i> ]chromen-4-one | <b>57</b> | 6.27 ( MiaPaCa-2)<br>10.40 (MCF-7)                                                | Kumar <i>et al.</i> <sup>63</sup>  |
| 4 <i>H</i> -Benzo[ <i>h</i> ]chromen-4-one | <b>56</b> | 11.21 ( MiaPaCa-2)<br>15.43 (MCF-7)                                               | Kumar <i>et al.</i> <sup>63</sup>  |
| Novel myricetin derivative                 | <b>62</b> | 1.86 ( MDA-MB-231)<br>5.72 (SGC-7901)<br>6.02 (MGC-803)                           | Xue <i>et al.</i> <sup>83</sup>    |
| Halogenated flavanone                      | <b>65</b> | 11.3 (MCF-7)<br>10.9 (MDA-MB-231)<br>11.6 (PC-3)<br>5.7 (HepG2)<br>12.8 (SK-N-MC) | Safavi <i>et al.</i> <sup>67</sup> |
| Halogenated flavanone                      | <b>63</b> | 19.3 (MCF-7)<br>8.2 (MDA-MB-231)<br>17.7 (PC-3)<br>9.8 (HepG2)<br>10.3 (SK-N-MC)  | Safavi <i>et al.</i> <sup>67</sup> |
| Halogenated flavanone                      | <b>64</b> | 20.7 (MCF-7)<br>7.7 (MDA-MB-231)<br>10.9 (SK-N-MC)                                | Safavi <i>et al.</i> <sup>67</sup> |
| Halogenated flavanone                      | <b>66</b> | 25.8 (MCF-7)<br>2.9 (MDA-MB-231)                                                  | Safavi <i>et al.</i> <sup>67</sup> |

|                                                                |           |                                                                               |                                        |
|----------------------------------------------------------------|-----------|-------------------------------------------------------------------------------|----------------------------------------|
|                                                                |           | 12.2 (PC-3)<br>20.7 (HepG2)<br>24.0 (SK-N-MC)                                 |                                        |
| Coumarin-pyrazoline hybrid                                     | <b>67</b> | 0.01 (HCT-116 )                                                               | Amin <i>et al.</i> <sup>75</sup>       |
| Coumarin-stilbene hybrid                                       | <b>69</b> | 0.29 (H460)<br>3.2 (A431)<br>3.5 (JR8)                                        | Belluti <i>et al.</i> <sup>76</sup>    |
| Coumarin-stilbene hybrid                                       | <b>68</b> | 0.45 (H460),<br>3.44 (A431),<br>3.2 (JR8)                                     | Belluti <i>et al.</i> <sup>76</sup>    |
| Coumarin-benzimidazole hybrid                                  | <b>70</b> | 80.51 (HL-60)<br>72.52 (CCRF-<br>CEM )<br>70.68 (T-47D)<br>72.67 (HCT-15<br>) | Paul <i>et al.</i> <sup>77</sup>       |
| Coumarin-manosterol hybrid                                     | <b>72</b> | 2.4 (MCF-7)<br>3.1 (T47D)                                                     | Sashidhara <i>et al.</i> <sup>78</sup> |
| 2,4-Diarylpyrano[3,2- <i>c</i> ]chromen-<br>5(4 <i>H</i> )-one | <b>77</b> | 1.4 (HCT-116)<br>4.3 (MiaPaCa-2)                                              | Kumar <i>et al.</i> <sup>104</sup>     |
| 2,4-Diarylpyrano[3,2- <i>c</i> ]chromen-                       | <b>73</b> | 9.32 (HCT-116)                                                                | Kumar <i>et al.</i> <sup>81</sup>      |

|                                                                                                       |            |                                             |                                                                                        |
|-------------------------------------------------------------------------------------------------------|------------|---------------------------------------------|----------------------------------------------------------------------------------------|
| 5(4 <i>H</i> )-one                                                                                    |            | 15.43 (MiaPaCa-2)                           |                                                                                        |
| Coumarin and chromene derivative                                                                      | <b>85</b>  | 5.7 (MCF-7)<br>12.7 (MDA-MBA -231)          | Hussain <i>et al.</i> <sup>82</sup>                                                    |
| 6-Pyrazolinylcoumarin                                                                                 | <b>87</b>  | 1.88 (CCRF-CEM)<br>1.92 (MOLT-4 )           | Garazd <i>et al.</i> <sup>84</sup>                                                     |
| Triphenylethylene–coumarin hybrid                                                                     | <b>88</b>  | 8.51 (MCF-7)<br>8.38 (A-549)<br>7.99 (HeLa) | Zhang <i>et al.</i> <sup>93</sup>                                                      |
| 2-Oxo-2 <i>H</i> -chromen-8-yl                                                                        | <b>99</b>  | 3.5 to13.1<br>Col2, KB, and LNCaP           | Lee <i>et al.</i> <sup>114</sup><br>and<br>Laphookhieo<br><i>et al.</i> <sup>115</sup> |
| 3,4,8-Trihydroxy-2-methoxy-1-(3-methylbut-2-enyl)-9 <i>H</i> -xanthen-9-one                           | <b>103</b> | 0.65 (NCI-H187)                             | Laphookhieo<br><i>et al.</i> <sup>115</sup>                                            |
| 1,3,7-Trihydroxy-2,4-di(3-methylbut-2-enyl)xanthone                                                   | <b>104</b> | 5.2 (NCI-H187)                              | Laphookhieo<br><i>et al.</i> <sup>115</sup>                                            |
| 1,6-Dihydroxy-7-methoxy-3-methyl-2,8-bis(3-methylbut-2-enyl)-9 <i>H</i> -xanthen-9-one                | <b>90</b>  | 0.92 (BC-1)                                 | Suksamrarn <i>et al.</i> <sup>121</sup>                                                |
| 6,9,10-Trihydroxy-3,3-dimethyl-8-(3-methylbut-2-enyl)pyrano[2,3- <i>c</i> ]xanthen-7(3 <i>H</i> )-one | <b>109</b> | 8.1 (A2780)                                 | Cao <i>et al.</i> <sup>127</sup>                                                       |
| Xanthen-10-yl-2-methylbut-2-enoic                                                                     | <b>112</b> | 0.2 (HepG2)                                 | Jang <i>et al.</i> <sup>133</sup>                                                      |

|                                                                                                                                                                                                                                                        |            |                                         |                                              |
|--------------------------------------------------------------------------------------------------------------------------------------------------------------------------------------------------------------------------------------------------------|------------|-----------------------------------------|----------------------------------------------|
| acid OR (2Z)-4-((10S,10aR)-<br>2,6,8,9,10,10a-hexahydro-7-methoxy-<br>2-methyl-12-(3-methylbut-2-enyl)-2-<br>(4-methylpent-3-enyl)-6,9-<br>dioxopyrano[3,2- <i>b</i> ]xanthen-10-yl)-2-<br>methylbut-2-enoic acid                                      |            |                                         |                                              |
| Xanthen-10-yl-2-methylbut-2-enoic<br>acid OR (2Z)-4-((10S,10aR)-<br>2,6,8,9,10,10a-hexahydro-7-methoxy-<br>2-methyl-12-(3-methylbut-2-enyl)-2-<br>(4-methylpent-3-enyl)-6,9-<br>dioxopyrano[3,2- <i>b</i> ]xanthen-10-yl)-2-<br>methylbut-2-enoic acid | <b>113</b> | 0.6 (K562)                              | Jang <i>et al.</i> <sup>133</sup>            |
| Rugulosone                                                                                                                                                                                                                                             | <b>118</b> | 1.3 (BC1)<br>2.6 (KB)<br>1.3 (NCI-H187) | Mosoophon <i>et al.</i> <sup>135</sup>       |
| Substituted xanthene                                                                                                                                                                                                                                   | <b>119</b> | 37.9 (Colo-205)                         | Bhattacharya<br><i>et al.</i> <sup>136</sup> |
| 3,4,5,8-Tetrahydroxy-1,2-bis(3-<br>methylbut-2-enyl)-9 <i>H</i> -xanthen-9-one                                                                                                                                                                         | <b>120</b> | 2.8 (HL-60)                             | Niu <i>et al.</i> <sup>137</sup>             |
| 3,4,5,8-Tetrahydroxy-1,2-bis(3-<br>methylbut-2-enyl)-9 <i>H</i> -xanthen-9-one                                                                                                                                                                         | <b>121</b> | 3.1(HL-60)                              | Niu <i>et al.</i> <sup>137</sup>             |
| 3,4,5,8-Tetrahydroxy-1,2-bis(3-                                                                                                                                                                                                                        | <b>122</b> | 3.4 (HL-60)                             | Niu <i>et al.</i> <sup>137</sup>             |

|                                             |  |  |  |
|---------------------------------------------|--|--|--|
| methylbut-2-enyl)-9 <i>H</i> -xanthen-9-one |  |  |  |
|---------------------------------------------|--|--|--|

\*By default, activities are in  $\mu\text{M}$ , except in exceptional cases in nM (when specified in brackets)
